# Supplementary material
Source: Springer Nature journal article supplement (https://www.springermedizin.de/resource/supplementary/12935_2010_255_MOESM2_ESM.pdf/9540156)

Caco2-E  
Less Tumorigenic

SW620  
More Tumorigenic

Control

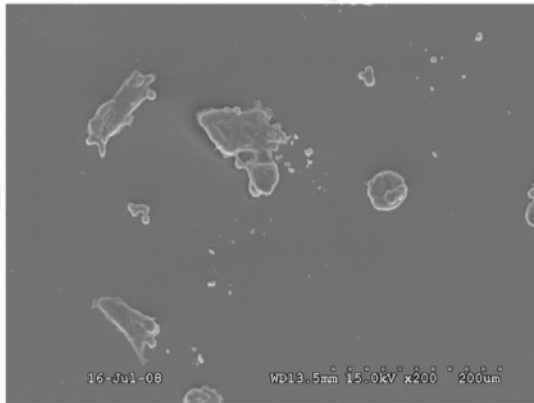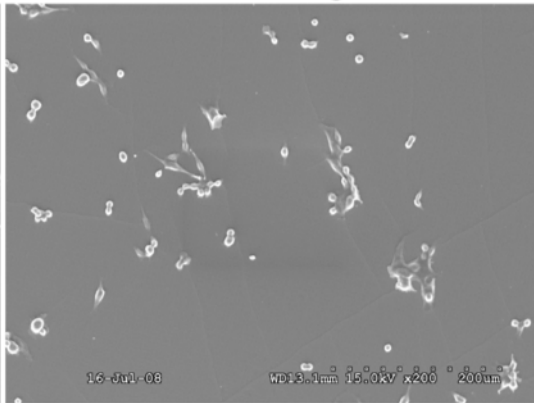

Pit

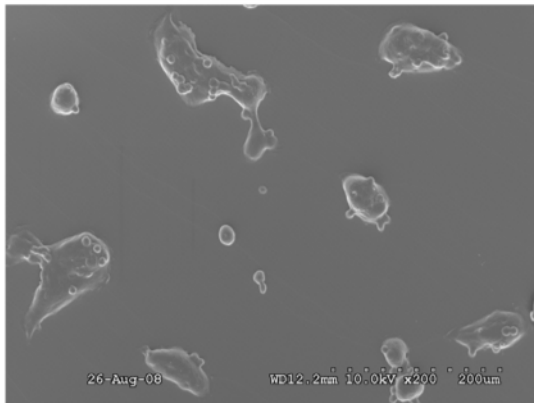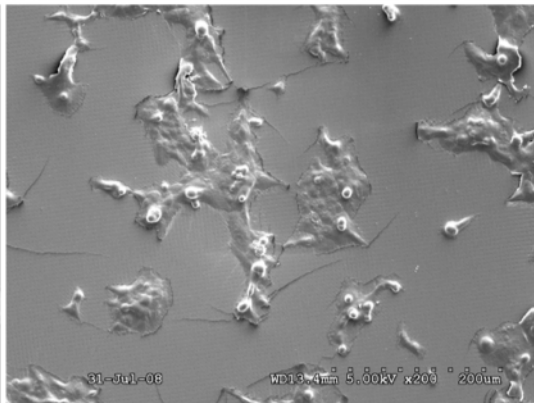

Post

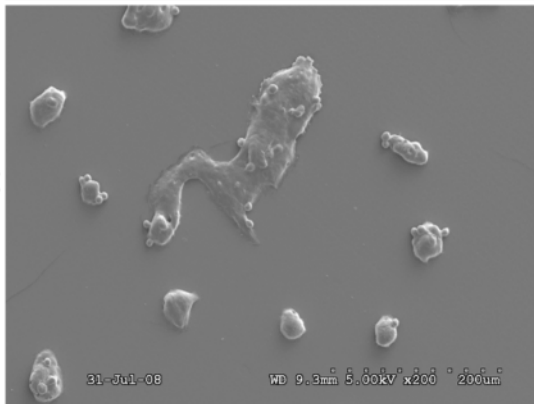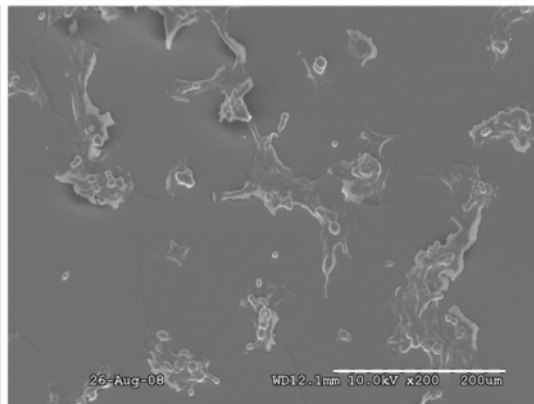

Supplement: MOESM2 [file 9540156]
